# Supplementary material for: The relationship between different exercise modes and visuospatial working memory in older adults: a cross-sectional study
Source: PeerJ. 2016 Jul 20;4:e2254. doi: 10.7717/peerj.2254 (PMC4957992; doi:10.7717/peerj.2254)
Supplement: Data S1 [file peerj-04-2254-s001.xlsx]

## Sheet: wm data
No.	Mode	VWMT						VMTT						VSMT
		Total RT	Total AC	Rotation RT	Rotation AC	Non-rotation RT	Non-rotation AC	Total RT	Total AC	Rotation RT	Rotation AC	Non-rotation RT	Non-rotation AC	Total RT	Total AC	Rotation RT	Rotation AC	Non-rotation RT	Non-rotation AC
301	2	0.930719	0.725	0.907577	0.75	0.955515	0.7	1.51177	0.8	1.46382	0.85	1.56612	0.75	0.831409	0.925	0.745393	0.9	0.912897	0.95
304	2	1.09923	0.85	1.12136	0.9	1.07433	0.8	1.92598	0.775	2.2266	0.65	1.70887	0.9	0.773445	0.95	0.708477	0.95	0.838412	0.95
306	2	1.30951	0.975	1.18666	1	1.43884	0.95	2.12915	0.95	2.58123	0.95	1.67707	0.95	0.996156	0.925	1.01252	0.9	0.980655	0.95
307	1	1.06987	0.65	1.02337	0.85	1.15769	0.45	1.67673	0.875	1.77577	0.9	1.57186	0.85	1.05975	0.775	0.949295	0.85	1.19386	0.7
308	1	1.11874	0.625	1.11786	0.8	1.12031	0.45	1.73101	0.575	1.68744	0.75	1.8127	0.4	0.743418	0.9	0.652884	1	0.856585	0.8
310	2	1.10904	0.7	1.16961	0.6	1.06361	0.8	1.4736	0.875	1.61906	0.8	1.35112	0.95	0.754854	1	0.716444	1	0.793264	1
311	1	1.04671	0.875	1.09944	0.8	1.0023	0.95	2.08859	0.75	2.46524	0.7	1.75903	0.8	0.960168	0.9	0.909214	0.95	1.01712	0.85
312	2	0.83652	0.9	0.697206	1	1.01066	0.8	1.21362	0.925	1.16693	1	1.26855	0.85	0.69065	0.9	0.598623	1	0.805684	0.8
313	1	1.00885	0.9	1.06042	0.95	0.951212	0.85	1.51195	0.9	1.50916	0.9	1.51474	0.9	0.792141	0.925	0.806857	0.9	0.7782	0.95
314	1	0.655506	0.775	0.625091	0.8	0.687949	0.75	1.13395	0.775	1.0545	0.8	1.2187	0.75	0.639044	0.825	0.597094	0.85	0.683615	0.8
315	1	0.962503	0.8	0.849386	0.85	1.0907	0.75	1.65879	0.55	2.21273	0.35	1.40029	0.75	0.812836	0.825	0.597993	0.95	1.10441	0.7
316	1	1.30993	0.85	1.441	0.85	1.17885	0.85	2.53156	0.9	3.03703	0.8	2.12718	1	0.95599	0.9	0.895125	1	1.03207	0.8
317	1	1.0158	0.7	0.967402	0.9	1.10292	0.5	1.70939	0.875	1.72891	0.95	1.68621	0.8	0.997257	0.825	0.883338	1	1.17252	0.65
318	2	1.17135	0.725	1.04373	0.7	1.29046	0.75	2.1727	0.95	2.31671	1	2.01268	0.9	1.03906	0.75	1.02503	0.75	1.05308	0.75
319	2	0.849954	0.9	0.854996	0.85	0.845442	0.95	1.56231	0.825	1.5874	0.85	1.53565	0.8	0.757106	0.8	0.78945	0.85	0.72045	0.75
320	2	1.11085	0.75	1.03267	0.95	1.24587	0.55	1.97406	0.9	1.84043	0.95	2.1234	0.85	0.965112	0.95	0.992115	0.95	0.938109	0.95
321	2	1.14664	0.6	1.13263	0.7	1.16625	0.5	2.36915	0.4	2.48262	0.5	2.18002	0.3	0.823488	0.775	0.788433	0.9	0.872027	0.65
322	2	1.52397	0.825	1.26628	0.8	1.76651	0.85	2.1694	0.925	2.34767	1	1.95967	0.85	1.05944	0.875	0.909075	1	1.25993	0.75
323	1	1.47884	0.975	1.384	1	1.57867	0.95	1.86191	0.775	2.00379	0.7	1.74506	0.85	0.907771	0.95	0.776791	0.95	1.03875	0.95
325	1	1.19945	0.775	1.12969	0.85	1.28414	0.7	1.83756	0.925	2.00144	0.95	1.66459	0.9	1.01069	0.5	0.98421	0.55	1.04306	0.45
326	1	1.42503	0.925	0.877181	1	2.06957	0.85	2.04913	0.825	2.00649	0.9	2.1003	0.75	0.914999	0.9	0.846432	1	1.00071	0.8
327	1	1.53101	0.775	1.73586	0.6	1.40164	0.95	2.59261	0.7	3.10198	0.5	2.30963	0.9	0.972803	0.95	0.881019	1	1.07479	0.9
328	3	1.02891	0.9	0.964342	0.85	1.08668	0.95	2.0563	0.875	2.03413	0.85	2.07724	0.9	0.69399	1	0.669947	1	0.718033	1
329	2	1.41804	0.8	1.34016	0.85	1.50632	0.75	2.1702	0.85	2.21626	0.8	2.12925	0.9	1.04675	0.875	0.963119	1	1.15826	0.75
330	2	1.03395	0.8	0.95281	1	1.16918	0.6	1.43642	0.8	1.42192	0.95	1.45761	0.65	0.895711	0.8	0.824663	0.75	0.958401	0.85
331	2	1.12913	0.675	1.11926	0.6	1.13703	0.75	1.49192	0.875	1.5625	0.75	1.43899	1	0.642442	0.95	0.615134	0.95	0.669751	0.95
332	3	1.10133	0.95	1.11221	1	1.08925	0.9	1.57268	0.95	1.75227	0.95	1.39309	0.95	0.650046	0.95	0.599017	0.95	0.701076	0.95
333	1	1.35604	0.825	1.36352	0.95	1.3459	0.7	1.86659	0.975	1.9888	0.95	1.75049	1	0.892095	1	0.929433	1	0.854756	1
334	1	0.861188	0.7	0.884931	0.65	0.840611	0.75	1.57334	0.75	1.80964	0.6	1.41581	0.9	0.6874	0.875	0.691205	0.9	0.683371	0.85
335	2	1.0626	0.9	1.1043	0.85	1.02529	0.95	1.90995	0.925	1.91946	0.95	1.89991	0.9	0.733364	0.975	0.680724	1	0.788773	0.95
336	1	1.68324	0.775	1.60911	0.8	1.76231	0.75	2.08976	0.9	2.08496	0.9	2.09457	0.9	0.978406	0.95	0.971901	0.95	0.984911	0.95
337	1	1.12325	0.575	1.04214	0.35	1.15874	0.8	2.36926	0.65	2.27082	0.5	2.43078	0.8	0.799081	0.975	0.804384	1	0.793499	0.95
338	3	1.09891	0.975	0.958921	1	1.24627	0.95	2.59454	0.725	2.67578	0.85	2.47944	0.6	0.737399	0.875	0.63345	0.95	0.860838	0.8
339	2	1.29267	0.9	1.49069	0.95	1.07136	0.85	1.94416	0.85	2.07687	0.85	1.81146	0.85	0.69639	1	0.659825	1	0.732955	1
340	1	0.938811	0.9	0.803741	0.95	1.08977	0.85	1.73981	0.825	1.54432	0.75	1.90272	0.9	0.800107	1	0.785482	1	0.814732	1
342	2	1.26617	0.85	1.25134	1	1.28737	0.7	1.60329	0.875	1.45888	0.95	1.77477	0.8	1.21245	0.975	1.26565	0.95	1.1619	1
344	1	1.20499	0.775	1.16887	0.9	1.25501	0.65	1.36051	0.875	1.34358	0.9	1.37843	0.85	1.0338	0.875	0.875194	1	1.24528	0.75
345	2	1.14073	0.775	1.06982	0.75	1.2072	0.8	1.38303	0.925	1.34104	0.95	1.42735	0.9	0.829994	0.9	0.795837	0.9	0.864152	0.9
346	2	1.36766	0.775	1.4288	0.75	1.31034	0.8	2.0249	0.925	2.13252	0.95	1.9113	0.9	0.976869	0.975	0.923012	0.95	1.02803	1
347	1	0.681682	0.725	0.650981	0.9	0.73192	0.55	1.25969	0.8	1.13611	0.8	1.38327	0.8	0.558606	0.775	0.495993	0.95	0.657744	0.6
348	1	1.09895	0.825	1.13043	0.9	1.06117	0.75	2.23191	0.85	2.57859	0.7	1.98923	1	0.869404	0.85	0.835692	1	0.917563	0.7
351	2	0.998568	0.975	0.780791	1	1.22781	0.95	1.64759	0.925	1.50431	0.95	1.79882	0.9	0.591783	0.9	0.547678	0.95	0.641077	0.85
352	1	1.11783	0.775	1.17251	1	1.01841	0.55	1.80687	0.825	1.86353	0.9	1.73888	0.75	0.859026	0.875	0.877045	0.9	0.839946	0.85
353	1	1.04358	0.875	0.827244	1	1.33203	0.75	1.21404	0.775	1.18393	0.8	1.24616	0.75	0.872077	0.9	0.847944	0.85	0.893669	0.95
354	2	1.32992	0.95	1.20117	1	1.47297	0.9	2.05037	0.85	2.11307	0.9	1.97983	0.8	1.00006	0.975	0.926226	0.95	1.07021	1
355	1	1.02941	0.8	0.99803	0.75	1.05709	0.85	1.80361	0.875	2.08715	0.85	1.53582	0.9	0.624047	0.875	0.586428	0.95	0.668719	0.8
356	2	1.37498	0.8	1.34257	0.8	1.4074	0.8	1.87523	0.95	2.06203	0.9	1.7071	1	0.839309	0.95	0.732427	0.95	0.946191	0.95
357	3	1.65289	0.825	1.70383	0.85	1.59876	0.8	2.24868	0.95	2.50847	0.95	1.98888	0.95	1.14077	0.9	1.04729	0.9	1.23424	0.9
358	2	1.2694	0.875	1.55106	0.85	1.00339	0.9	2.08358	0.9	2.64458	0.9	1.52258	0.9	0.884822	0.95	0.956275	1	0.80543	0.9
359	1	1.42428	0.75	1.32094	0.8	1.54239	0.7	1.71197	0.85	1.81305	0.9	1.59826	0.8	1.14069	0.775	0.887983	1	1.60014	0.55
360	1	1.78878	0.625	1.61259	0.7	2.01301	0.55	2.7146	0.8	2.66502	0.8	2.76419	0.8	0.816459	0.925	0.757861	0.9	0.871972	0.95
361	2	1.46756	0.85	1.61915	0.9	1.29702	0.8	2.09686	0.95	2.26841	1	1.90626	0.9	0.902586	0.975	0.851487	1	0.956374	0.95
362	3	0.887141	0.925	0.863649	1	0.914778	0.85	1.40619	0.8	1.54585	0.7	1.29757	0.9	0.73626	0.95	0.722476	0.95	0.750044	0.95
363	3	0.871867	0.9	0.893383	0.85	0.852616	0.95	1.37691	0.9	1.3956	1	1.35354	0.8	0.692084	0.95	0.686745	0.95	0.697423	0.95
365	3	1.10224	0.95	1.04985	1	1.16045	0.9	1.64374	0.925	1.65126	0.85	1.63736	1	0.840068	0.975	0.815056	0.95	0.86383	1
367	3	0.95553	0.825	0.99129	0.9	0.912618	0.75	2.0876	0.8	2.57246	0.6	1.79669	1	0.784647	0.95	0.778914	0.95	0.79038	0.95
368	2	1.04583	0.875	0.981126	0.9	1.11434	0.85	1.50148	0.775	1.39965	1	1.68662	0.55	0.780426	0.925	0.707794	0.95	0.857094	0.9
369	2	0.84628	0.9	0.811171	0.95	0.885518	0.85	1.45307	0.9	1.55019	0.9	1.35594	0.9	0.707007	1	0.673286	1	0.740729	1
370	1	1.63372	0.875	1.39153	0.9	1.89016	0.85	2.16198	0.9	2.04566	0.85	2.26605	0.95	1.12304	1	1.08235	1	1.16374	1
371	1	1.00924	0.775	0.816576	1	1.35954	0.55	2.23157	0.8	1.91842	0.95	2.68926	0.65	0.919094	0.775	0.730752	1	1.26153	0.55
372	3	1.25857	0.875	1.26104	0.95	1.25564	0.8	1.94348	0.825	2.16788	0.8	1.73229	0.85	0.881264	0.925	0.900066	0.9	0.863452	0.95
373	2	1.49469	0.85	1.24991	0.85	1.73947	0.85	2.22503	0.875	2.26699	0.9	2.1806	0.85	0.868654	0.95	0.787557	0.95	0.949751	0.95
375	3	1.12658	0.875	1.15186	0.85	1.1027	0.9	1.73604	0.825	1.90505	0.65	1.62618	1	0.926332	0.975	0.896175	0.95	0.954982	1
376	3	0.800148	0.9	0.781108	0.9	0.819188	0.9	1.24599	0.95	1.28124	1	1.20683	0.9	0.74246	0.95	0.759187	0.9	0.727406	1
377	2	1.22936	0.9	1.34457	0.95	1.10059	0.85	2.22352	0.875	2.12126	0.85	2.32009	0.9	0.963919	0.825	0.930928	0.95	1.00869	0.7
378	1	0.918014	0.925	0.816948	1	1.03692	0.85	1.8563	0.95	1.82633	0.95	1.88628	0.95	0.744636	1	0.756358	1	0.732914	1
379	1	1.08214	0.825	0.95856	1	1.27226	0.65	1.91254	0.925	1.69321	0.95	2.14405	0.9	0.877834	0.975	0.7486	1	1.01387	0.95
380	2	1.2278	0.875	1.00923	1	1.51924	0.75	1.75622	0.875	1.39268	0.9	2.14115	0.85	0.732137	0.95	0.648687	0.95	0.815586	0.95
381	2	1.08624	0.875	1.11584	0.95	1.05109	0.8	1.79268	0.675	1.67873	0.4	1.84066	0.95	1.16718	0.8	1.13349	0.85	1.20536	0.75
382	1	1.83916	0.8	2.34249	0.75	1.39505	0.85	1.91301	0.825	1.96793	0.8	1.86131	0.85	1.12555	0.825	1.06559	0.9	1.1975	0.75
383	1	1.2375	0.85	1.29316	0.85	1.18184	0.85	1.99259	0.95	2.24396	0.95	1.74122	0.95	0.891496	0.975	0.868744	1	0.915445	0.95
384	1	1.70914	0.75	1.57847	0.75	1.83982	0.75	1.98845	0.575	1.79826	0.6	2.19593	0.55	0.996157	0.875	0.933997	0.9	1.06197	0.85
385	2	0.653287	0.8	0.645626	0.85	0.661969	0.75	1.25019	0.85	1.34673	0.75	1.17397	0.95	0.585542	0.825	0.516295	0.8	0.650715	0.85
386	3	0.910928	0.875	1.04825	0.75	0.807936	1	1.6601	0.9	2.02803	0.8	1.36576	1	0.745193	1	0.716158	1	0.774228	1
387	2	0.729452	0.875	0.714349	0.95	0.747388	0.8	1.18961	0.8	1.08696	0.8	1.29225	0.8	0.657592	0.975	0.560768	1	0.759512	0.95
388	2	1.08971	0.775	1.07561	0.7	1.10132	0.85	1.95249	0.925	1.99475	0.95	1.90789	0.9	0.637856	1	0.618691	1	0.65702	1
389	1	1.68431	0.625	1.75889	0.65	1.60352	0.6	2.28117	0.85	2.17994	0.75	2.36109	0.95	1.11474	0.825	0.981034	0.9	1.27519	0.75
390	1	0.930481	0.75	0.900485	0.9	0.975476	0.6	1.76809	0.95	1.85757	1	1.66867	0.9	0.812821	0.95	0.761903	0.95	0.863739	0.95
391	3	1.04794	0.825	0.970878	0.95	1.15253	0.7	1.8855	0.825	1.6375	0.85	2.14899	0.8	0.948689	0.85	0.754669	1	1.22586	0.7
392	2	1.58417	0.8	1.70198	0.85	1.45064	0.75	2.16574	0.9	2.15022	0.85	2.17962	0.95	1.07193	0.975	0.904978	1	1.24767	0.95
401	3	1.38512	0.925	1.49046	0.95	1.27393	0.9	2.28484	0.9	2.51682	0.85	2.07728	0.95	0.910298	0.975	0.885176	0.95	0.934165	1
402	3	1.1576	0.9	0.972078	0.9	1.34312	0.9	1.88399	0.75	1.51575	0.9	2.43635	0.6	0.875082	1	0.774142	1	0.976022	1
403	3	1.11578	0.85	1.09036	0.8	1.13838	0.9	1.82172	0.825	2.38141	0.7	1.40932	0.95	0.858927	0.975	0.791889	0.95	0.922613	1
405	3	1.53232	0.675	1.47604	0.75	1.60266	0.6	2.13023	0.8	2.28442	0.75	1.99418	0.85	0.973233	0.9	1.03335	0.85	0.919445	0.95
406	3	1.39219	0.875	1.527	0.8	1.27867	0.95	1.78777	0.9	2.09096	0.9	1.48458	0.9	0.844159	0.925	0.786806	0.9	0.898493	0.95
407	3	1.40473	0.85	1.53511	0.75	1.30179	0.95	1.906	0.875	2.19809	0.8	1.66003	0.95	1.04044	0.9	1.13841	0.85	0.952779	0.95
408	3	1.12722	0.8	1.13702	0.8	1.11743	0.8	1.67349	0.85	1.73413	0.95	1.59669	0.75	0.924528	0.975	0.830824	0.95	1.01355	1
409	3	0.85132	0.875	0.779642	0.95	0.936439	0.8	1.59195	0.925	1.67496	0.95	1.50433	0.9	0.680958	0.875	0.628199	1	0.751303	0.75
412	3	0.854378	0.825	0.897742	0.75	0.818242	0.9	1.38046	0.95	1.31772	1	1.45016	0.9	0.735098	0.925	0.689142	1	0.789165	0.85
413	3	1.31474	0.9	1.22572	0.9	1.40377	0.9	1.8988	0.825	2.13414	0.9	1.6164	0.75	1.02427	0.975	0.927773	1	1.12585	0.95
414	3	0.996109	0.775	1.02905	0.9	0.950502	0.65	2.23594	0.975	2.46186	1	1.99813	0.95	0.661835	0.95	0.651076	0.95	0.672595	0.95
415	3	1.13342	0.925	1.14303	1	1.12212	0.85	1.75093	0.875	1.95364	0.9	1.53629	0.85	0.868804	1	0.939206	1	0.798402	1
416	3	1.6209	0.8	1.4679	0.9	1.81762	0.7	2.14319	0.85	2.48055	0.8	1.84331	0.9	1.04855	0.825	0.915812	0.95	1.2287	0.7
417	2	1.16854	0.9	1.24217	0.95	1.08624	0.85	2.51067	0.8	2.87915	0.9	2.03691	0.7	0.887813	0.95	0.816808	0.95	0.958818	0.95
418	3	1.60202	0.775	1.59664	0.75	1.60705	0.8	2.36197	0.85	2.35176	0.9	2.37346	0.8	1.00757	0.95	0.948747	0.95	1.0664	0.95
419	3	0.948197	0.8	0.781188	0.8	1.11521	0.8	1.2763	0.675	1.13435	0.65	1.40811	0.7	0.69674	0.925	0.643351	0.95	0.753095	0.9
420	3	0.848469	0.8	0.867897	0.85	0.826451	0.75	1.35274	0.825	1.32778	0.9	1.38268	0.75	0.743392	0.825	0.723145	0.9	0.767687	0.75
421	3	1.65839	0.775	1.55792	0.75	1.75258	0.8	2.46611	0.775	2.43346	0.8	2.50094	0.75	0.770289	0.8	0.814052	0.75	0.731675	0.85
422	3	1.02115	0.875	1.07859	1	0.944556	0.75	1.4546	0.9	1.52009	1	1.37273	0.8	0.96733	0.95	0.970256	0.9	0.964696	1
423	3	0.931369	0.9	0.955023	1	0.901801	0.8	1.86593	0.975	1.94093	0.95	1.79469	1	0.704265	0.925	0.629835	0.95	0.782829	0.9
424	3	1.26864	0.85	1.31836	0.85	1.21891	0.85	1.95982	0.95	1.99591	0.95	1.92374	0.95	0.939561	0.95	0.89809	0.9	0.976885	1
425	3	1.11955	0.825	1.08043	0.9	1.1665	0.75	1.75159	0.775	1.72394	0.9	1.78988	0.65	0.83603	0.9	0.741776	1	0.953847	0.8

## Sheet: participants
			MMSE													IPAQ
No.		age	Total score													Vigorous day	Vigorous minutes/week	Moderate day	Moderate minutes/week	Walking day	walking minutes/week	sedentary minutes/week	Exercise mode	Height	Weight
301	female	63	29	5	5	3	4	3	1	1	1	3	1	1	1	0	0	7	240	7	120	240	2	162	61
304	female	67	29	5	5	3	5	2	1	1	1	3	1	1	1	7	120	7	60	7	30	180	2	158	72
306	female	53	28	5	5	3	5	1	1	1	1	3	1	1	1	2	30	5	60	7	90	180	2	150	52
307	female	60	28	5	5	3	4	2	1	1	1	3	1	1	1	0	0	7	25	7	90	600	1	166	70
308	female	56	26	4	5	3	3	2	1	1	1	3	1	1	1	7	30	3	20	7	60	180	1	148	53
310	male	69	30	5	5	3	5	3	1	1	1	3	1	1	1	7	120	7	30	7	30	480	2	162	53
311	male	82	28	5	5	3	4	3	1	1	0	3	1	1	1	0	0	0	0	7	25	420	1	168	61
312	female	57	30	5	5	3	5	3	1	1	1	3	1	1	1	2	20	1	120	7	120	150	1	165	62
313	female	60	26	5	5	3	2	2	1	1	1	3	1	1	1	0	0	3	120	3	120	240	1	150	67
314	male	65	29	5	5	3	5	3	1	1	1	3	1	1	0	2	10	7	120	3	30	240	1	163	62
315	female	59	29	5	5	3	5	2	1	1	1	3	1	1	1	0	0	7	45	3	15	120	1	158	59
316	female	62	30	5	5	3	5	3	1	1	1	3	1	1	1	0	0	7	120	7	300	120	1	165	65
317	female	60	30	5	5	3	5	3	1	1	1	3	1	1	1	7	60	7	10	7	60	90	1	160	62
318	female	67	26	5	5	3	5	1	1	1	1	1	1	1	1	0	0	7	30	7	60	300	2	162	71
319	female	61	29	5	5	3	5	2	1	1	1	3	1	1	1	0	0	5	300	7	180	480	2	162	60
320	female	78	29	5	5	3	5	2	1	1	1	3	1	1	1	7	10	7	150	7	40	240	2	150	57
321	female	61	26	4	5	3	4	2	1	1	1	3	1	1	0	7	60	7	20	7	15	180	2	155	55
322	female	62	30	5	5	3	5	3	1	1	1	3	1	1	1	7	100	7	160	7	30	240	2	160	58
323	male	79	27	5	5	2	5	1	1	1	1	3	1	1	1	0	0	0	0	7	30	300	1	170	65
325	female	58	28	5	5	3	5	2	1	1	1	2	1	1	1	0	0	7	180	7	60	120	1	163	62
326	female	57	27	5	5	3	4	1	1	1	1	3	1	1	1	7	10	7	100	7	60	240	1	154	49
327	male	77	28	4	5	3	5	2	1	1	1	3	1	1	1	0	0	7	140	7	120	300	1	165	67
328	female	73	27	5	5	3	4	1	1	1	1	3	1	1	1	7	100	7	100	7	60	480	3	160	55
329	female	60	29	5	5	3	5	2	1	1	1	3	1	1	1	0	0	7	150	7	120	180	2	169	59
330	female	58	25	5	5	3	1	2	1	1	1	3	1	1	1	7	100	7	190	7	300	120	2	156	54
331	female	58	29	5	5	3	5	2	1	1	1	3	1	1	1	0	0	7	130	7	190	120	2	155	54
332	male	66	30	5	5	3	5	3	1	1	1	3	1	1	1	0	0	7	30	7	120	300	3	171	70
333	male	61	30	5	5	3	5	3	1	1	1	3	1	1	1	0	0	0	0	7	30	300	1	171	55
334	female	69	27	5	5	3	3	2	1	1	1	3	1	1	1	0	0	7	90	7	60	180	1	162	62
335	male	69	27	5	5	3	2	3	1	1	1	3	1	1	1	0	0	5	210	7	180	150	2	174	70
336	female	58	26	5	5	3	2	2	1	1	1	3	1	1	1	0	0	7	60	7	120	360	1	161	65
337	female	53	30	5	5	3	5	3	1	1	1	3	1	1	1	0	0	7	120	7	60	240	1	162	78
338	female	77	29	5	5	3	5	2	1	1	1	3	1	1	1	5	30	7	65	7	80	300	3	151	69
339	female	81	25	5	5	3	1	2	1	1	1	3	1	1	1	0	0	7	30	5	15	180	2	170	75
340	female	60	26	5	5	3	2	3	1	1	0	3	1	1	1	0	0	7	60	7	30	120	1	160	60
342	female	58	28	4	5	3	5	3	1	1	1	2	1	1	1	3	30	7	40	4	60	480	2	160	68
344	female	58	28	5	5	3	5	2	1	1	1	2	1	1	1	0	0	7	60	7	60	450	1	160	64
345	female	70	28	5	5	2	5	2	1	1	1	3	1	1	1	0	0	7	60	7	45	150	2	149	61
346	male	80	28	4	5	3	3	3	1	1	1	3	1	1	1	0	0	7	80	7	60	180	2	163	60
347	female	77	28	4	5	3	5	2	1	1	1	3	1	1	1	0	0	7	210	3	20	180	1	158	106
348	male	73	27	5	5	3	3	2	1	1	1	3	1	1	1	0	0	7	40	7	60	360	1	176	67
351	female	65	28	5	5	3	3	3	1	1	1	3	1	1	1	0	0	7	180	7	120	360	2	158	70
352	male	76	28	5	5	3	5	2	1	1	1	3	1	1	0	0	0	7	30	7	60	240	1	165	70
353	female	64	28	5	5	3	5	1	1	1	1	3	1	1	1	0	0	7	60	7	30	300	1	163	60
354	female	67	30	5	5	3	5	3	1	1	1	3	1	1	1	0	0	7	240	3	30	120	2	160	65
355	female	65	29	5	5	3	5	3	1	1	1	3	1	1	1	0	0	7	600	7	20	300	1	164	50
356	female	53	30	5	5	3	5	3	1	1	1	3	1	1	1	0	0	7	150	7	120	120	2	164	56
357	female	62	23	3	5	3	3	0	1	1	1	3	1	1	1	7	120	7	240	0	0	180	3	160	60
358	male	71	30	5	5	3	5	3	1	1	1	3	1	1	1	0	0	7	240	7	30	240	2	172	60
359	female	59	29	5	5	3	4	3	1	1	1	3	1	1	1	0	0	2	60	5	90	150	1	162	50
360	female	64	30	5	5	3	5	3	1	1	1	3	1	1	1	0	0	7	240	7	150	180	2	160	66
361	female	69	30	5	5	3	5	3	1	1	1	3	1	1	1	0	0	7	210	7	180	120	2	159	60
362	female	64	28	4	5	3	5	3	1	1	1	3	1	1	0	0	0	7	180	2	30	420	3	158	63
363	female	64	30	5	5	3	5	3	1	1	1	3	1	1	1	0	0	7	300	0	0	360	3	157	56
365	female	69	29	5	5	3	4	3	1	1	1	3	1	1	1	0	0	7	210	2	60	180	3	162	60
367	male	60	30	5	5	3	5	3	1	1	1	3	1	1	1	0	0	7	150	7	60	300	3	170	80
368	female	62	27	5	5	3	2	3	1	1	1	3	1	1	1	0	0	7	120	7	60	400	2	160	50
369	female	58	28	5	5	3	5	2	1	1	1	3	1	1	0	0	0	7	70	7	120	400	2	163	57
370	male	72	30	5	5	3	5	3	1	1	1	3	1	1	1	0	0	7	10	7	60	480	1	172	80
371	female	64	26	5	5	3	1	3	1	1	1	3	1	1	1	0	0	7	240	7	60	180	1	158	62
372	male	72	29	5	5	3	5	3	1	1	1	3	1	1	0	0	0	7	90	7	20	150	3	162	60
373	female	56	30	5	5	3	5	3	1	1	1	3	1	1	1	7	60	7	240	7	120	180	2	163	55
375	male	65	29	5	5	3	5	2	1	1	1	3	1	1	1	7	120	7	30	7	300	300	3	174	75
376	female	62	30	5	5	3	5	3	1	1	1	3	1	1	1	7	180	7	30	7	60	300	3	162	61
377	female	65	28	4	5	3	5	2	1	1	1	3	1	1	1	0	0	7	90	7	30	240	2	165	65
378	female	61	29	5	5	3	5	2	1	1	1	3	1	1	1	0	0	7	80	4	60	330	1	163	65
379	female	66	27	4	5	3	4	3	1	1	1	3	1	1	0	0	0	7	135	7	30	180	1	161	60
380	female	56	29	5	5	3	4	3	1	1	1	3	1	1	1	0	0	7	15	7	120	480	2	161	73
381	male	80	29	4	5	3	5	3	1	1	1	3	1	1	1	0	0	5	30	5	90	480	2	167	62
382	female	66	25	5	5	3	2	1	1	1	1	3	1	1	1	0	0	7	130	7	60	120	1	162	56
383	female	57	29	5	5	3	5	2	1	1	1	3	1	1	1	0	0	7	10	7	60	360	1	158	64
384	female	73	26	4	5	3	5	1	1	1	1	2	1	1	1	0	0	0	0	7	60	600	1	154	70
385	female	79	30	5	5	3	5	3	1	1	1	3	1	1	1	0	0	7	360	7	60	180	2	157	53
386	female	75	30	5	5	3	5	3	1	1	1	3	1	1	1	0	0	7	270	7	60	120	3	150	58
387	female	65	26	5	5	3	3	3	1	1	1	2	1	1	0	1	120	7	250	7	60	180	2	163	64
388	female	53	29	5	5	3	4	3	1	1	1	3	1	1	1	7	40	1	130	7	120	420	2	164	65
389	male	66	26	5	5	3	1	3	1	1	1	3	1	1	1	0	0	7	10	7	60	360	1	168	75
390	female	58	28	5	5	3	4	2	1	1	1	3	1	1	1	0	0	7	30	7	20	90	1	158	58
391	male	66	28	5	5	3	5	1	1	1	1	3	1	1	1	0	0	7	170	7	120	120	3	173	75
392	female	69	28	5	5	3	3	3	1	1	1	3	1	1	1	0	0	7	90	7	60	210	2	147	55
401	female	68	29	5	5	3	5	2	1	1	1	3	1	1	1	7	60	7	30	7	60	240	3	161	60
402	male	74	30	5	5	3	5	3	1	1	1	3	1	1	1	7	90	7	60	7	60	120	3	172	65
403	female	60	30	5	5	3	5	3	1	1	1	3	1	1	1	7	180	7	180	7	60	120	3	169	56
405	female	63	29	5	5	3	4	3	1	1	1	3	1	1	1	7	120	7	120	7	30	240	3	153	56
406	male	64	29	5	5	3	5	2	1	1	1	3	1	1	1	7	20	7	30	7	40	150	3	171	72
407	male	58	30	5	5	3	5	3	1	1	1	3	1	1	1	2	60	5	60	7	10	360	3	167	65
408	male	70	25	5	5	3	2	2	1	1	0	3	1	1	1	0	0	4	120	7	90	120	3	165	65
409	male	70	28	5	5	3	5	2	1	1	1	2	1	1	1	0	0	5	90	7	30	150	3	178	73
412	male	62	27	5	5	3	3	2	1	1	1	3	1	1	1	0	0	7	240	7	30	240	3	176	80
413	female	62	29	5	5	3	5	2	1	1	1	3	1	1	1	0	0	7	240	3	30	240	3	158	48
414	male	61	25	5	5	3	1	2	1	1	1	3	1	1	1	0	0	7	240	7	90	120	3	170	70
415	male	71	29	5	5	3	5	2	1	1	1	3	1	1	1	0	0	7	240	7	60	180	3	168	64
416	male	67	27	5	5	3	3	2	1	1	1	3	1	1	1	0	0	7	90	7	60	180	3	165	55
417	female	68	29	5	5	3	5	2	1	1	1	3	1	1	1	0	0	7	180	7	90	240	2	153	50
418	male	74	28	5	5	3	3	3	1	1	1	3	1	1	1	0	0	7	210	7	30	180	3	178	84
419	male	71	29	5	5	3	5	2	1	1	1	3	1	1	1	0	0	7	240	7	60	180	3	168	62
420	male	68	28	5	5	3	3	3	1	1	1	3	1	1	1	0	0	7	180	7	90	180	3	164	70
421	female	67	28	5	5	3	3	3	1	1	1	3	1	1	1	7	120	7	60	7	90	120	3	168	55
422	female	54	29	5	5	3	4	3	1	1	1	3	1	1	1	7	40	7	190	7	40	180	3	168	70
423	male	63	25	5	5	3	1	2	1	1	1	3	1	1	1	0	0	7	180	7	60	120	3	168	68
424	female	60	28	5	5	3	4	3	1	1	0	3	1	1	1	0	0	7	180	7	120	180	3	158	68
425	female	63	25	5	5	3	2	1	1	1	1	3	1	1	1	0	0	7	190	7	120	300	3	156	55
